# Supplementary material
Source: publisher figshare collection journal article supplement (https://gsajournals.figshare.com/articles/dataset/_/6086876)
Supplement: Supplementary file 1 [file 1]

## Genetic loci governing androgenic capacity in perennial ryegrass (*Lolium perenne* L.)

Rachel F. Begheyne, Steven A. Yates, Timothy Sykes and Bruno Studer\*

Molecular Plant Breeding, Institute of Agricultural Sciences, ETH Zurich, 8092 Zurich, Switzerland

\*Corresponding author. Email: bruno.studer@usys.ethz.ch

### Supplementary information

**Table S3** Gene annotations for each scaffold found to be significantly associated with the response to anther culture.

| Scaffold | Scaffold length (kbp) | Start (bp) | End (bp) | Arabidopsis locus | Name(s) or description                                                              |
|----------|-----------------------|------------|----------|-------------------|-------------------------------------------------------------------------------------|
| 60       | 277.8                 | 7100       | 73719    | AT5G52450         | MATE efflux family protein                                                          |
|          |                       | 36155      | 38008    | AT5G52450         | MATE efflux family protein                                                          |
|          |                       | 41600      | 42255    | AT5G52450         | MATE efflux family protein                                                          |
|          |                       | 114910     | 119696   | AT2G15240         | UNC-50 family protein                                                               |
| 123      | 256.4                 | 22922      | 26802    | AT3G02410         | ICME-LIKE2, ISOPRENILCYSTEINE METHYLESTERASE-LIKE 2                                 |
|          |                       | 22922      | 26802    | AT5G15860         | ATPCME, ICME, ISOPRENILCYSTEINE METHYLESTERASE, PCME, PRENYLCYSTEINE METHYLESTERASE |
|          |                       | 27463      | 31921    | AT3G18040         | MAP KINASE 9, MPK9                                                                  |
|          |                       | 197961     | 200766   | AT5G07990         | CYP75B1, CYTOCHROME P450 75B1, D501, TRANSPARENT TESTA 7, TT7                       |
|          |                       | 204751     | 213979   | AT5G52450         | MATE efflux family protein                                                          |
| 127      | 250.4                 | 38352      | 41786    | AT1G19330         | Histone deacetylase complex subunit                                                 |
|          |                       | 227351     | 228127   | AT1G29860         | ATWRKY71, EXB1, EXCESSIVE BRANCHES1, WRKY DNA-BINDING PROTEIN 71, WRKY71            |

| Scaffold | Scaffold length (kbp) | Start (bp) | End (bp) | Arabidopsis locus | Name(s) or description                                                                 |
|----------|-----------------------|------------|----------|-------------------|----------------------------------------------------------------------------------------|
| 233      | 212.6                 | 13284      | 39350    | AT5G15070         | ARABIDOPSIS HOMOLOG OF YEAST VIP1 2, ATVIP2, VIH1, VIP HOMOLOG 1, VIP1 HOMOLOG 2, VIP2 |
|          |                       | 123380     | 130183   | AT5G62670         | AHA11, H(+)-ATPASE 11, HA11                                                            |
|          |                       | 131144     | 134955   | AT1G27150         | Tetratricopeptide repeat (TPR)-like superfamily protein                                |
|          |                       | 199043     | 204791   | AT3G05545         | RING/U-box superfamily protein                                                         |
| 813      | 154                   | 34360      | 44241    | AT1G33290         | P-loop containing nucleoside triphosphate hydrolases superfamily protein               |
|          |                       | 98603      | 105466   | AT5G14420         | RGLG2, RING DOMAIN LIGASE2                                                             |
|          |                       | 149380     | 153333   | AT1G47830         | SNARE-like superfamily protein                                                         |
| 815      | 148.4                 | 7582       | 22714    | AT2G20330         | Transducin/WD40 repeat-like superfamily protein                                        |
|          |                       | 23376      | 32394    | AT4G21470         | ATFMN/FHY, FMN/FHY, RIBOFLAVIN KINASE/FMN HYDROLASE                                    |
|          |                       | 58149      | 62391    | AT2G01120         | ATORC4, ORC4, ORIGIN RECOGNITION COMPLEX SUBUNIT 4                                     |
|          |                       | 139557     | 146531   | AT5G43920         | Transducin/WD40 repeat-like superfamily protein                                        |
| 1607     | 115.8                 | 28155      | 33804    | AT5G57140         | ATPAP28, PAP28, PURPLE ACID PHOSPHATASE 28                                             |
|          |                       | 44535      | 50663    | AT2G27100         | SE, SERRATE                                                                            |
|          |                       | 89740      | 92906    | AT3G07040         | RESISTANCE TO PSEUDOMONAS SYRINGAE 3, RPM1, RPS3                                       |
|          |                       | 100317     | 104480   | AT3G07040         | RESISTANCE TO PSEUDOMONAS SYRINGAE 3, RPM1, RPS3                                       |
| 1669     | 116.6                 | 36273      | 49336    | AT3G63520         | ATCCD1, ATNCED1, CAROTENOID CLEAVAGE DIOXYGENASE 1, CCD1, NCED1                        |
| 2075     | 106.6                 | 6177       | 6430     | AT1G70680         | Caleosin-related family protein                                                        |
|          |                       | 7022       | 9674     | AT1G70670         | ARABIDOPSIS THALIANA CALEOSIN 4, ATCLO4, CALEOSIN 4, CLO4, PEROXYGENASE 4, PXG4        |
| 2554     | 103                   | 2585       | 8463     | AT2G45260         | Myosin-4 protein (DUF641)                                                              |
|          |                       | 46779      | 53204    | AT5G35210         | PHD TYPE TRANSCRIPTION FACTOR WITH TRANSMEMBRANE DOMAINS, PTM                          |
| 3194     | 88.8                  | 21212      | 27087    | AT3G46820         | TOPP5, TYPE ONE SERINE/THREONINE PROTEIN PHOSPHATASE 5                                 |

| Scaffold | Scaffold length (kbp) | Start (bp) | End (bp) | Arabidopsis locus | Name(s) or description                                                                                           |
|----------|-----------------------|------------|----------|-------------------|------------------------------------------------------------------------------------------------------------------|
|          |                       | 36911      | 38396    | AT5G64700         | UMAMIT21, USUALLY MULTIPLE ACIDS MOVE IN AND OUT TRANSPORTERS 21                                                 |
|          |                       | 43210      | 51417    | AT2G47580         | SPLICEOSOMAL PROTEIN U1A, U1A                                                                                    |
|          |                       | 51670      | 56416    | AT3G52860         | MED28, MEDIATOR28                                                                                                |
| 3723     | 81.3                  | 37204      | 45974    | AT1G63810         | Nucleolar protein                                                                                                |
|          |                       | 80302      | 80933    | AT4G23160         | CRK8, CYSTEINE-RICH RLK (RECEPTOR-LIKE PROTEIN KINASE) 8                                                         |
| 4385     | 80.8                  | 20744      | 21199    | AT5G26880         | AGAMOUS-LIKE 26, AGL26                                                                                           |
|          |                       | 35922      | 58157    | AT3G23640         | HETEROGLYCAN GLUCOSIDASE 1, HGL1                                                                                 |
|          |                       | 67663      | 70662    | AT4G15240         | Glycosyltransferase (DUF604)                                                                                     |
|          |                       | 71970      | 75561    | AT3G20740         | FERTILIZATION-INDEPENDENT ENDOSPERM 1, FIE, FIE1, FIS3                                                           |
| 6186     | 59.2                  | 35206      | 36492    | AT1G70090         | GALACTURONOSYLTRANSFERASE-LIKE 9, GATL9, GLUCOSYL TRANSFERASE FAMILY 8, LGT8                                     |
|          |                       | 47809      | 54233    | AT1G12000         | Phosphofructokinase family protein                                                                               |
| 6436     | 57                    | 45334      | 47951    | AT4G13330         | S-adenosyl-L-methionine-dependent methyltransferases superfamily protein                                         |
|          |                       | 48789      | 50285    | AT5G20190         | Tetratricopeptide repeat (TPR)-like superfamily protein                                                          |
|          |                       | 51151      | 57039    | AT5G43960         | Nuclear transport factor 2 (NTF2) family protein with RNA binding (RRM-RBD-RNP motifs) domain-containing protein |
| 7045     | 53.2                  | 1236       | 5326     | AT4G38180         | FAR1-RELATED SEQUENCE 5, FRS5                                                                                    |
|          |                       | 6122       | 14989    | AT2G23380         | CLF, CURLY LEAF, ICU1, INCURVATA 1, SDG1, SET1, SETDOMAIN 1, SETDOMAIN GROUP 1                                   |
|          |                       | 39822      | 46005    | AT5G52010         | C2H2-like zinc finger protein                                                                                    |
|          |                       | 39823      | 45693    | AT1G28600         | GDSL-motif esterase/acyltransferase/lipase                                                                       |
| 8920     | 44.9                  | 2729       | 10974    | AT1G75850         | LAZ4, VPS35 HOMOLOG B, VPS35B                                                                                    |
| 15142    | 24.8                  | 16759      | 22240    | AT5G08560         | ATWDR26, WD-40 REPEAT 26, WDR26                                                                                  |
| 16597    | 14.2                  | 7880       | 8705     | AT5G54960         | PDC2, PYRUVATE DECARBOXYLASE-2                                                                                   |
