# Supplementary material
Source: publisher figshare collection journal article supplement (https://gsajournals.figshare.com/articles/dataset/_/6086876)
Supplement: Supplementary file 2 [file 1]

## Genetic loci governing androgenic capacity in perennial ryegrass (*Lolium perenne* L.)

Rachel F. Begheyn, Steven A. Yates, Timothy Sykes and Bruno Studer\*

Molecular Plant Breeding, Institute of Agricultural Sciences, ETH Zurich, 8092 Zurich, Switzerland

\*Corresponding author. Email: bruno.studer@usys.ethz.ch

### Supplementary information

**Table S1** Overview of pair-cross parents and their progeny populations used for phenotypic evaluation of in vitro anther culture capacity.

| Population | Parents    |   |                   | Number of genotypes evaluated in |      |               |
|------------|------------|---|-------------------|----------------------------------|------|---------------|
|            | Androgenic |   | Non-androgenic    | 2015                             | 2016 | In both years |
| 1          | P2         | × | P133 <sup>1</sup> | 49                               | 50   | 45            |
| 2          | P2         | × | P10 <sup>1</sup>  | 43                               | -    | -             |
| 3          | P2         | × | P48 <sup>1</sup>  | 30                               | -    | -             |
| 4          | P102       | × | P133 <sup>1</sup> | 25                               | 32   | 18            |
| 6          | P102       | × | P48 <sup>1</sup>  | 15                               | 21   | 8             |
| 7          | P169       | × | P133 <sup>1</sup> | 17                               | 13   | 7             |
| 8          | P169       | × | P10 <sup>1</sup>  | 20                               | -    | -             |
| 10         | P2         | × | P144 <sup>2</sup> | 48                               | -    | -             |
| 11         | P2         | × | P175 <sup>3</sup> | 48                               | -    | -             |
| 12         | P2         | × | P84 <sup>2</sup>  | 11                               | -    | -             |
| 15         | P102       | × | P84 <sup>2</sup>  | 7                                | -    | -             |
| Sum        |            |   |                   | 313                              | 116  | 78            |

<sup>1</sup>Many albinos, no green plants; <sup>2</sup>many embryos, no plants; <sup>3</sup>no embryos, no plants.
