# Supplementary material
Source: publisher figshare collection journal article supplement (https://gsajournals.figshare.com/articles/dataset/_/6086876)
Supplement: Supplementary file 3 [file 1]

## Genetic loci governing androgenic capacity in perennial ryegrass (*Lolium perenne* L.)

Rachel F. Begheyn, Steven A. Yates, Timothy Sykes and Bruno Studer\*

Molecular Plant Breeding, Institute of Agricultural Sciences, ETH Zurich, 8092 Zurich, Switzerland

\*Corresponding author. Email: bruno.studer@usys.ethz.ch

### Supplementary information

**Table S2** The set of 192 unique (5-10 bp) single restriction enzyme (PstI) genotyping-by-sequencing barcodes and PCR primers used in this study. Barcodes were designed using the Deena Bioinformatics online GBS Barcode Generator (<http://www.deenabio.com/nl/services/gbs-adapters>) and synthesized by Microsynth (Balgach, Switzerland).

| Oligo ID | Sequence (5' - 3')                        |
|----------|-------------------------------------------|
| 2174689  | ACACTCTTCCCTACACGACGCTCTCCGATCTGTGTTTGCA  |
| 2174690  | ACACTCTTCCCTACACGACGCTCTCCGATCTAACCATGCA  |
| 2174691  | ACACTCTTCCCTACACGACGCTCTCCGATCTACATATGCA  |
| 2174692  | ACACTCTTCCCTACACGACGCTCTCCGATCTGAAGATGCA  |
| 2174693  | ACACTCTTCCCTACACGACGCTCTCCGATCTTTCTATGCA  |
| 2174694  | ACACTCTTCCCTACACGACGCTCTCCGATCTAGTCGTGCA  |
| 2174695  | ACACTCTTCCCTACACGACGCTCTCCGATCTTAATGTGCA  |
| 2174696  | ACACTCTTCCCTACACGACGCTCTCCGATCTGTTTCATGCA |
| 2174697  | ACACTCTTCCCTACACGACGCTCTCCGATCTCAGATTGCA  |
| 2174698  | ACACTCTTCCCTACACGACGCTCTCCGATCTATAGGTGCA  |
| 2174699  | ACACTCTTCCCTACACGACGCTCTCCGATCTCGATTTGCA  |
| 2174700  | ACACTCTTCCCTACACGACGCTCTCCGATCTAATGTTGCA  |
| 2174701  | ACACTCTTCCCTACACGACGCTCTCCGATCTTGCATTGCA  |
| 2174702  | ACACTCTTCCCTACACGACGCTCTCCGATCTACAGTATGCA |
| 2174703  | ACACTCTTCCCTACACGACGCTCTCCGATCTGCTCCATGCA |
| 2174704  | ACACTCTTCCCTACACGACGCTCTCCGATCTCATGCATGCA |
| 2174705  | ACACTCTTCCCTACACGACGCTCTCCGATCTGAATCATGCA |
| 2174706  | ACACTCTTCCCTACACGACGCTCTCCGATCTCCTAAGTGCA |
| 2174707  | ACACTCTTCCCTACACGACGCTCTCCGATCTTGGCAATGCA |
| 2174708  | ACACTCTTCCCTACACGACGCTCTCCGATCTGTAGCGTGCA |
| 2174709  | ACACTCTTCCCTACACGACGCTCTCCGATCTACCTAGTGCA |
| 2174710  | ACACTCTTCCCTACACGACGCTCTCCGATCTATGACGTGCA |
| 2174711  | ACACTCTTCCCTACACGACGCTCTCCGATCTCTAGAATGCA |
| 2174712  | ACACTCTTCCCTACACGACGCTCTCCGATCTGATACGTGCA |
| 2174713  | ACACTCTTCCCTACACGACGCTCTCCGATCTTCCGAATGCA |
| 2174714  | ACACTCTTCCCTACACGACGCTCTCCGATCTCAGTGATGCA |
| 2174715  | ACACTCTTCCCTACACGACGCTCTCCGATCTAGTCCGTGCA |
| 2174716  | ACACTCTTCCCTACACGACGCTCTCCGATCTGTCCAATGCA |
| 2174717  | ACACTCTTCCCTACACGACGCTCTCCGATCTCAGGTGTGCA |

| Oligo ID | Sequence (5' - 3')                           |
|----------|----------------------------------------------|
| 2174718  | ACACTCTTTCCCTACACGACGCTCTCCGATCTTCACGATGCA   |
| 2174719  | ACACTCTTTCCCTACACGACGCTCTCCGATCTTGCAAGTGCA   |
| 2174720  | ACACTCTTTCCCTACACGACGCTCTCCGATCTGGCGTATGCA   |
| 2174721  | ACACTCTTTCCCTACACGACGCTCTCCGATCTATACGGTGCA   |
| 2174722  | ACACTCTTTCCCTACACGACGCTCTCCGATCTACTGCTTGCA   |
| 2174723  | ACACTCTTTCCCTACACGACGCTCTCCGATCTCGGATATGCA   |
| 2174724  | ACACTCTTTCCCTACACGACGCTCTCCGATCTTAGTCTTGCA   |
| 2174725  | ACACTCTTTCCCTACACGACGCTCTCCGATCTTCTGTATGCA   |
| 2174726  | ACACTCTTTCCCTACACGACGCTCTCCGATCTCCTGCAATGCA  |
| 2174727  | ACACTCTTTCCCTACACGACGCTCTCCGATCTTTATACGTGCA  |
| 2174728  | ACACTCTTTCCCTACACGACGCTCTCCGATCTTGACAATGCA   |
| 2174729  | ACACTCTTTCCCTACACGACGCTCTCCGATCTCCGTGCATGCA  |
| 2174730  | ACACTCTTTCCCTACACGACGCTCTCCGATCTATACAAGTGCA  |
| 2174731  | ACACTCTTTCCCTACACGACGCTCTCCGATCTGGTCCGATGCA  |
| 2174732  | ACACTCTTTCCCTACACGACGCTCTCCGATCTAATGCCGTGCA  |
| 2174733  | ACACTCTTTCCCTACACGACGCTCTCCGATCTGCGTTAATGCA  |
| 2174734  | ACACTCTTTCCCTACACGACGCTCTCCGATCTCTCAAGATGCA  |
| 2174735  | ACACTCTTTCCCTACACGACGCTCTCCGATCTTAGCCGATGCA  |
| 2174736  | ACACTCTTTCCCTACACGACGCTCTCCGATCTGTACGCGTGCA  |
| 2174737  | ACACTCTTTCCCTACACGACGCTCTCCGATCTAACGCTATGCA  |
| 2174738  | ACACTCTTTCCCTACACGACGCTCTCCGATCTTCTATGGTGCA  |
| 2174739  | ACACTCTTTCCCTACACGACGCTCTCCGATCTGGCTATATGCA  |
| 2174740  | ACACTCTTTCCCTACACGACGCTCTCCGATCTCAGGTCGTGCA  |
| 2174741  | ACACTCTTTCCCTACACGACGCTCTCCGATCTGTGACAATGCA  |
| 2174742  | ACACTCTTTCCCTACACGACGCTCTCCGATCTTCGTAGATGCA  |
| 2174743  | ACACTCTTTCCCTACACGACGCTCTCCGATCTAGCTTAATGCA  |
| 2174744  | ACACTCTTTCCCTACACGACGCTCTCCGATCTTTGCTAATGCA  |
| 2174745  | ACACTCTTTCCCTACACGACGCTCTCCGATCTCCATCGGTGCA  |
| 2174746  | ACACTCTTTCCCTACACGACGCTCTCCGATCTTAACGAATGCA  |
| 2174747  | ACACTCTTTCCCTACACGACGCTCTCCGATCTCTCGAAGTGCA  |
| 2174748  | ACACTCTTTCCCTACACGACGCTCTCCGATCTGATACTATGCA  |
| 2174749  | ACACTCTTTCCCTACACGACGCTCTCCGATCTAACGTCCATGCA |
| 2174750  | ACACTCTTTCCCTACACGACGCTCTCCGATCTCCTCGCCATGCA |
| 2174751  | ACACTCTTTCCCTACACGACGCTCTCCGATCTAGTGTGCATGCA |
| 2174752  | ACACTCTTTCCCTACACGACGCTCTCCGATCTGATCTCCATGCA |
| 2174753  | ACACTCTTTCCCTACACGACGCTCTCCGATCTCCACCTGATGCA |
| 2174754  | ACACTCTTTCCCTACACGACGCTCTCCGATCTGCAATGCATGCA |
| 2174755  | ACACTCTTTCCCTACACGACGCTCTCCGATCTGCCTTCCATGCA |
| 2174756  | ACACTCTTTCCCTACACGACGCTCTCCGATCTTTGTCCGATGCA |
| 2174757  | ACACTCTTTCCCTACACGACGCTCTCCGATCTCCTCTGAATGCA |
| 2174758  | ACACTCTTTCCCTACACGACGCTCTCCGATCTTTAGGCCATGCA |
| 2174759  | ACACTCTTTCCCTACACGACGCTCTCCGATCTTGCGCGATGCA  |
| 2174760  | ACACTCTTTCCCTACACGACGCTCTCCGATCTGGCTCACATGCA |
| 2174761  | ACACTCTTTCCCTACACGACGCTCTCCGATCTTCTCGCATGCA  |
| 2174762  | ACACTCTTTCCCTACACGACGCTCTCCGATCTGTAGGCGTGCA  |

| Oligo ID | Sequence (5' - 3')                             |
|----------|------------------------------------------------|
| 2174763  | ACACTCTTTCCCTACACGACGCTCTTCCGATCTCTTAGTCATGCA  |
| 2174764  | ACACTCTTTCCCTACACGACGCTCTTCCGATCTTCTGACCATGCA  |
| 2174765  | ACACTCTTTCCCTACACGACGCTCTTCCGATCTCCTAACAGTGCA  |
| 2174766  | ACACTCTTTCCCTACACGACGCTCTTCCGATCTTACAGCCATGCA  |
| 2174767  | ACACTCTTTCCCTACACGACGCTCTTCCGATCTTTCAAGCATGCA  |
| 2174768  | ACACTCTTTCCCTACACGACGCTCTTCCGATCTAAGATCGATGCA  |
| 2174769  | ACACTCTTTCCCTACACGACGCTCTTCCGATCTAACAAGTGTGCA  |
| 2174770  | ACACTCTTTCCCTACACGACGCTCTTCCGATCTTGCCGACGTGCA  |
| 2174771  | ACACTCTTTCCCTACACGACGCTCTTCCGATCTAGAGTCAATGCA  |
| 2174772  | ACACTCTTTCCCTACACGACGCTCTTCCGATCTGGATGCCATGCA  |
| 2174773  | ACACTCTTTCCCTACACGACGCTCTTCCGATCTTTGGTCTCATGCA |
| 2174774  | ACACTCTTTCCCTACACGACGCTCTTCCGATCTGGCTAGGCATGCA |
| 2174775  | ACACTCTTTCCCTACACGACGCTCTTCCGATCTAGGTGGTCTTGCA |
| 2174776  | ACACTCTTTCCCTACACGACGCTCTTCCGATCTCCTCCTAGTTGCA |
| 2174777  | ACACTCTTTCCCTACACGACGCTCTTCCGATCTTTCTGTACTTGCA |
| 2174778  | ACACTCTTTCCCTACACGACGCTCTTCCGATCTCCTACGACATGCA |
| 2174779  | ACACTCTTTCCCTACACGACGCTCTTCCGATCTGAGGTCCATGCA  |
| 2174780  | ACACTCTTTCCCTACACGACGCTCTTCCGATCTAGAATAACATGCA |
| 2174781  | ACACTCTTTCCCTACACGACGCTCTTCCGATCTCCTTAGCCATGCA |
| 2174782  | ACACTCTTTCCCTACACGACGCTCTTCCGATCTTTCGCCGCATGCA |
| 2174783  | ACACTCTTTCCCTACACGACGCTCTTCCGATCTAGGCATTATGCA  |
| 2174784  | ACACTCTTTCCCTACACGACGCTCTTCCGATCTGAACGTACATGCA |
| 2174785  | AACACAGATCGGAAGAGCGTCGTGTAGGGAAAGAGTGT         |
| 2174786  | TGGTTAGATCGGAAGAGCGTCGTGTAGGGAAAGAGTGT         |
| 2174787  | TATGTAGATCGGAAGAGCGTCGTGTAGGGAAAGAGTGT         |
| 2174788  | TCTTCAGATCGGAAGAGCGTCGTGTAGGGAAAGAGTGT         |
| 2174789  | TAGAAAGATCGGAAGAGCGTCGTGTAGGGAAAGAGTGT         |
| 2174790  | CGACTAGATCGGAAGAGCGTCGTGTAGGGAAAGAGTGT         |
| 2174791  | CATTAAGATCGGAAGAGCGTCGTGTAGGGAAAGAGTGT         |
| 2174792  | TGAACAGATCGGAAGAGCGTCGTGTAGGGAAAGAGTGT         |
| 2174793  | ATCTGAGATCGGAAGAGCGTCGTGTAGGGAAAGAGTGT         |
| 2174794  | CCTATAGATCGGAAGAGCGTCGTGTAGGGAAAGAGTGT         |
| 2174795  | AATCGAGATCGGAAGAGCGTCGTGTAGGGAAAGAGTGT         |
| 2174796  | ACATTAGATCGGAAGAGCGTCGTGTAGGGAAAGAGTGT         |
| 2174797  | ATGCAAGATCGGAAGAGCGTCGTGTAGGGAAAGAGTGT         |
| 2174798  | TACTGTAGATCGGAAGAGCGTCGTGTAGGGAAAGAGTGT        |
| 2174799  | TGGAGCAGATCGGAAGAGCGTCGTGTAGGGAAAGAGTGT        |
| 2174800  | TGCATGAGATCGGAAGAGCGTCGTGTAGGGAAAGAGTGT        |
| 2174801  | TGATTCAGATCGGAAGAGCGTCGTGTAGGGAAAGAGTGT        |
| 2174802  | CTTAGGAGATCGGAAGAGCGTCGTGTAGGGAAAGAGTGT        |
| 2174803  | TTGCCAAGATCGGAAGAGCGTCGTGTAGGGAAAGAGTGT        |
| 2174804  | CGCTACAGATCGGAAGAGCGTCGTGTAGGGAAAGAGTGT        |
| 2174805  | CTAGGTAGATCGGAAGAGCGTCGTGTAGGGAAAGAGTGT        |
| 2174806  | CGTCATAGATCGGAAGAGCGTCGTGTAGGGAAAGAGTGT        |
| 2174807  | TTCTAGAGATCGGAAGAGCGTCGTGTAGGGAAAGAGTGT        |

| Oligo ID | Sequence (5' - 3')                        |
|----------|-------------------------------------------|
| 2174808  | CGTATCAGATCGGAAGAGCGTCGTGTAGGGAAAGAGTGT   |
| 2174809  | TTCGGAAGATCGGAAGAGCGTCGTGTAGGGAAAGAGTGT   |
| 2174810  | TCACTGAGATCGGAAGAGCGTCGTGTAGGGAAAGAGTGT   |
| 2174811  | CGGACTAGATCGGAAGAGCGTCGTGTAGGGAAAGAGTGT   |
| 2174812  | TTGGACAGATCGGAAGAGCGTCGTGTAGGGAAAGAGTGT   |
| 2174813  | CACCTGAGATCGGAAGAGCGTCGTGTAGGGAAAGAGTGT   |
| 2174814  | TCGTGAAGATCGGAAGAGCGTCGTGTAGGGAAAGAGTGT   |
| 2174815  | CTTGCAAGATCGGAAGAGCGTCGTGTAGGGAAAGAGTGT   |
| 2174816  | TACGCCAGATCGGAAGAGCGTCGTGTAGGGAAAGAGTGT   |
| 2174817  | CCGTATAGATCGGAAGAGCGTCGTGTAGGGAAAGAGTGT   |
| 2174818  | AGCAGTAGATCGGAAGAGCGTCGTGTAGGGAAAGAGTGT   |
| 2174819  | TATCCGAGATCGGAAGAGCGTCGTGTAGGGAAAGAGTGT   |
| 2174820  | AGACTAAGATCGGAAGAGCGTCGTGTAGGGAAAGAGTGT   |
| 2174821  | TACAAGAAGATCGGAAGAGCGTCGTGTAGGGAAAGAGTGT  |
| 2174822  | TTGCAGGAGATCGGAAGAGCGTCGTGTAGGGAAAGAGTGT  |
| 2174823  | CGTATAAAGATCGGAAGAGCGTCGTGTAGGGAAAGAGTGT  |
| 2174824  | TTGTGCAAGATCGGAAGAGCGTCGTGTAGGGAAAGAGTGT  |
| 2174825  | TGCACGGAGATCGGAAGAGCGTCGTGTAGGGAAAGAGTGT  |
| 2174826  | CTTGTATAGATCGGAAGAGCGTCGTGTAGGGAAAGAGTGT  |
| 2174827  | TCGGACCAGATCGGAAGAGCGTCGTGTAGGGAAAGAGTGT  |
| 2174828  | CGGCATTAGATCGGAAGAGCGTCGTGTAGGGAAAGAGTGT  |
| 2174829  | TTAACGCAGATCGGAAGAGCGTCGTGTAGGGAAAGAGTGT  |
| 2174830  | TCTTGAGAGATCGGAAGAGCGTCGTGTAGGGAAAGAGTGT  |
| 2174831  | TCGGCTAAGATCGGAAGAGCGTCGTGTAGGGAAAGAGTGT  |
| 2174832  | CGCGTACAGATCGGAAGAGCGTCGTGTAGGGAAAGAGTGT  |
| 2174833  | TAGCGTTAGATCGGAAGAGCGTCGTGTAGGGAAAGAGTGT  |
| 2174834  | CCATAGAAGATCGGAAGAGCGTCGTGTAGGGAAAGAGTGT  |
| 2174835  | TATAGCCAGATCGGAAGAGCGTCGTGTAGGGAAAGAGTGT  |
| 2174836  | CGACCTGAGATCGGAAGAGCGTCGTGTAGGGAAAGAGTGT  |
| 2174837  | TTGTCACAGATCGGAAGAGCGTCGTGTAGGGAAAGAGTGT  |
| 2174838  | TCTACGAAGATCGGAAGAGCGTCGTGTAGGGAAAGAGTGT  |
| 2174839  | TTAAGCTAGATCGGAAGAGCGTCGTGTAGGGAAAGAGTGT  |
| 2174840  | TTAGCAAAGATCGGAAGAGCGTCGTGTAGGGAAAGAGTGT  |
| 2174841  | CCGATGGAGATCGGAAGAGCGTCGTGTAGGGAAAGAGTGT  |
| 2174842  | TTCGTTAAGATCGGAAGAGCGTCGTGTAGGGAAAGAGTGT  |
| 2174843  | CTTCGAGAGATCGGAAGAGCGTCGTGTAGGGAAAGAGTGT  |
| 2174844  | TAGTATCAGATCGGAAGAGCGTCGTGTAGGGAAAGAGTGT  |
| 2174845  | TGGACGTTAGATCGGAAGAGCGTCGTGTAGGGAAAGAGTGT |
| 2174846  | TGGCGAGGAGATCGGAAGAGCGTCGTGTAGGGAAAGAGTGT |
| 2174847  | TGCACACTAGATCGGAAGAGCGTCGTGTAGGGAAAGAGTGT |
| 2174848  | TGGAGATCAGATCGGAAGAGCGTCGTGTAGGGAAAGAGTGT |
| 2174849  | TCAGGTGGAGATCGGAAGAGCGTCGTGTAGGGAAAGAGTGT |
| 2174850  | TGCATTGCAGATCGGAAGAGCGTCGTGTAGGGAAAGAGTGT |
| 2174851  | TGGAAGGCAGATCGGAAGAGCGTCGTGTAGGGAAAGAGTGT |
| 2174852  | TCGGACAAAGATCGGAAGAGCGTCGTGTAGGGAAAGAGTGT |

| Oligo ID | Sequence (5' - 3')                                                       |
|----------|--------------------------------------------------------------------------|
| 2174853  | TTCAGAGGAGATCGGAAGAGCGTCGTGTAGGGAAAGAGTGT                                |
| 2174854  | TGGCCTAAAGATCGGAAGAGCGTCGTGTAGGGAAAGAGTGT                                |
| 2174855  | TCGCGCCAAGATCGGAAGAGCGTCGTGTAGGGAAAGAGTGT                                |
| 2174856  | TGTGAGCCAGATCGGAAGAGCGTCGTGTAGGGAAAGAGTGT                                |
| 2174857  | TGCGAGGAAGATCGGAAGAGCGTCGTGTAGGGAAAGAGTGT                                |
| 2174858  | CGCCTACAAGATCGGAAGAGCGTCGTGTAGGGAAAGAGTGT                                |
| 2174859  | TGACTAAGAGATCGGAAGAGCGTCGTGTAGGGAAAGAGTGT                                |
| 2174860  | TGGTCAGAAGATCGGAAGAGCGTCGTGTAGGGAAAGAGTGT                                |
| 2174861  | CTGTTAGGAGATCGGAAGAGCGTCGTGTAGGGAAAGAGTGT                                |
| 2174862  | TGGCTGTAAGATCGGAAGAGCGTCGTGTAGGGAAAGAGTGT                                |
| 2174863  | TGCTTGAAGATCGGAAGAGCGTCGTGTAGGGAAAGAGTGT                                 |
| 2174864  | TCGATCTTAGATCGGAAGAGCGTCGTGTAGGGAAAGAGTGT                                |
| 2174865  | CACTTGTTAGATCGGAAGAGCGTCGTGTAGGGAAAGAGTGT                                |
| 2174866  | CGTCGGCAAGATCGGAAGAGCGTCGTGTAGGGAAAGAGTGT                                |
| 2174867  | TTGACTCTAGATCGGAAGAGCGTCGTGTAGGGAAAGAGTGT                                |
| 2174868  | TGGCATCCAGATCGGAAGAGCGTCGTGTAGGGAAAGAGTGT                                |
| 2174869  | TGAGACCAAGATCGGAAGAGCGTCGTGTAGGGAAAGAGTGT                                |
| 2174870  | TGCCTAGCCAGATCGGAAGAGCGTCGTGTAGGGAAAGAGTGT                               |
| 2174871  | AGACCACCTAGATCGGAAGAGCGTCGTGTAGGGAAAGAGTGT                               |
| 2174872  | ACTAGGAGGAGATCGGAAGAGCGTCGTGTAGGGAAAGAGTGT                               |
| 2174873  | AGTACAGAAAGATCGGAAGAGCGTCGTGTAGGGAAAGAGTGT                               |
| 2174874  | TGTCGTAGGAGATCGGAAGAGCGTCGTGTAGGGAAAGAGTGT                               |
| 2174875  | TGGAACCTCAGATCGGAAGAGCGTCGTGTAGGGAAAGAGTGT                               |
| 2174876  | TGTTATTCTAGATCGGAAGAGCGTCGTGTAGGGAAAGAGTGT                               |
| 2174877  | TGGCTAAGGAGATCGGAAGAGCGTCGTGTAGGGAAAGAGTGT                               |
| 2174878  | TGCGGCGAAAGATCGGAAGAGCGTCGTGTAGGGAAAGAGTGT                               |
| 2174879  | TGAATGCCTAGATCGGAAGAGCGTCGTGTAGGGAAAGAGTGT                               |
| 2174880  | TGTACGTTAGATCGGAAGAGCGTCGTGTAGGGAAAGAGTGT                                |
| 2174881  | TGCAGATCGGAAGAGCGTTTACGAGGAATGCCGAG <sup>1</sup>                         |
| 2174882  | CTCGGCATTCTGCTGAACCGCTCTCCGATCT <sup>1</sup>                             |
|          | AATGATACGGCGACACCGAGATCTACACTCTTCCCTACACGACGCTCTCCGATCT <sup>2</sup>     |
|          | CAAGCAGAAGACGGCATACGAGATCGGTCTCGGCATTCTGCTGAACCGCTCTCCGATCT <sup>2</sup> |

<sup>1</sup>Common adaptor; <sup>2</sup>PCR primer.
