# Supplementary material
Source: publisher figshare collection journal article supplement (https://gsajournals.figshare.com/articles/dataset/_/6086876)
Supplement: Supplementary file 4 [file 1]

## Genetic loci governing androgenic capacity in perennial ryegrass (*Lolium perenne* L.)

Rachel F. Begheyn, Steven A. Yates, Timothy Sykes and Bruno Studer\*

Molecular Plant Breeding, Institute of Agricultural Sciences, ETH Zurich, 8092 Zurich, Switzerland

\*Corresponding author. Email: bruno.studer@usys.ethz.ch

### Supplementary information

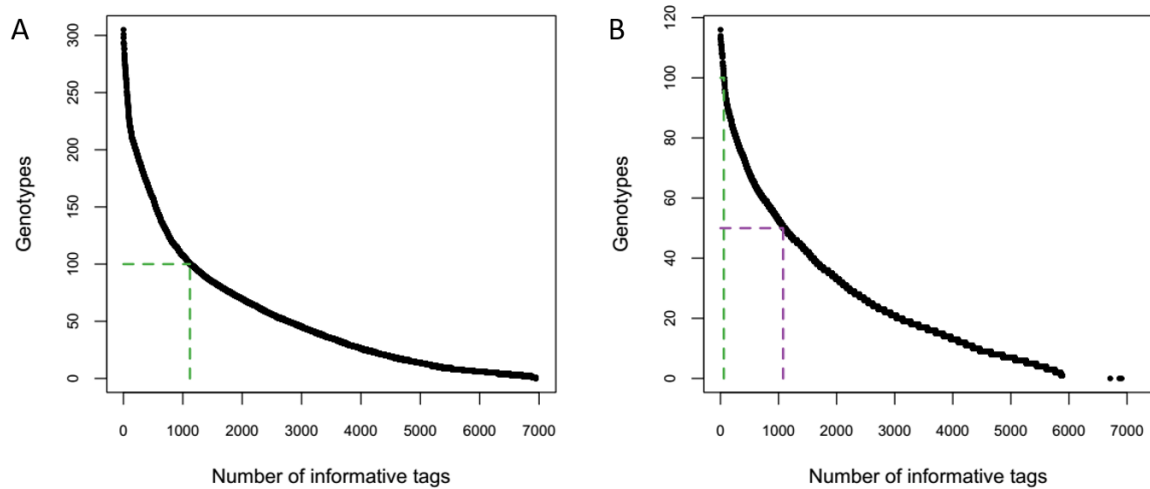

**Figure S1** Numbers of informative tags per number of genotypes in 2015 (**A**) and 2016 (**B**) with a minor allele frequency of 10%. In this study, a 100 genotype threshold was used for the 2015 data, resulting in 1120 informative tags (green line in graph **A**) and a 50 genotype threshold resulting in 1079 informative tags (purple line in graph **B**) was used for the 2016 data.
