# Supplementary material
Source: publisher figshare collection journal article supplement (https://gsajournals.figshare.com/articles/dataset/_/6086876)
Supplement: Supplementary file 5 [file 1]

## Genetic loci governing androgenic capacity in perennial ryegrass (*Lolium perenne* L.)

Rachel F. Begheyn, Steven A. Yates, Timothy Sykes and Bruno Studer\*

Molecular Plant Breeding, Institute of Agricultural Sciences, ETH Zurich, 8092 Zurich, Switzerland

\*Corresponding author. Email: [bruno.studer@usys.ethz.ch](mailto:bruno.studer@usys.ethz.ch)

### Supplementary information

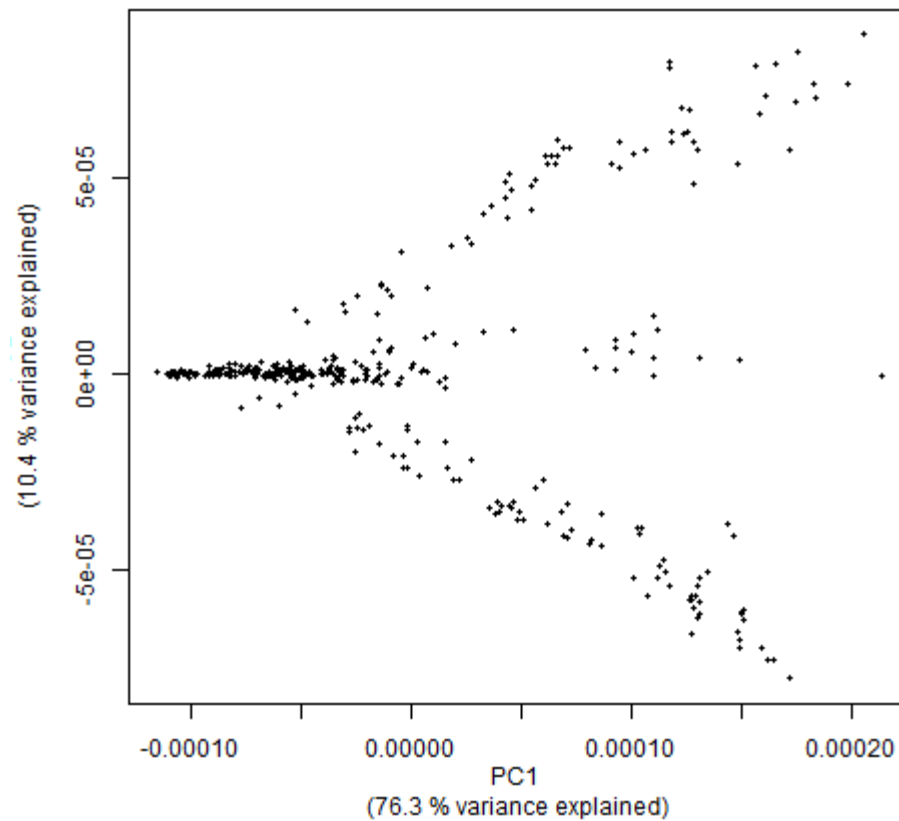

**Figure S2** The two principal components explaining the greatest variation from a principal component analysis of the genotypic information.
